# Supplementary material for: Auto-accelerating and auto-inhibiting phenomena in the oxidation process of organic contaminants by permanganate and manganese dioxide under acidic conditions: effects of manganese intermediates/products
Source: Royal Society of Chemistry journal article supplement (doi:10.1039/c6ra10196h), 2016-01-01
Supplement: c6ra10196h1.pdf [file c6ra10196h1.pdf]

## SUPPORTING INFORMATION

# Auto-accelerating and Auto-inhibiting Phenomena in the Oxidation Process of Organic Contaminants by Permanganate and Manganese Dioxide under Acidic Conditions: Effects of Manganese Intermediates/Products<sup>†</sup>

Bo Sun<sup>a</sup>, Dandan Rao<sup>b</sup>, Yuhai Sun<sup>c</sup> and Xiaohong Guan<sup>\*a,b</sup>

<sup>a</sup>State Key Laboratory of Urban Water Resource and Environment, Harbin Institute of Technology, Harbin 150090, People's Republic of China

<sup>b</sup>State Key Laboratory of Pollution Control and Resources Reuse, College of Environmental Science and Engineering, Tongji University, Shanghai 20092, People's Republic of China

<sup>c</sup>Sinopec Shengli Oilfield Engineering Technology Research Institute, Dongying 257000, People's Republic of China

<sup>†</sup>Electronic supplementary information (ESI) available.

E-mail addresses: sunbo880628@163.com (B. Sun), 541502729@qq.com (D.D. Rao), hitgXH@126.com (X.H. Guan)

\*Contact/Corresponding author contact information:

Xiaohong Guan, Email: hitgXH@126.com; Phone: +86(21) 65980956

| <b>Table of Contents</b>                                                                                                                                   | <b>Pages</b> |
|------------------------------------------------------------------------------------------------------------------------------------------------------------|--------------|
| Figure S1. Oxidation kinetics of aniline by permanganate at pH 4.5.                                                                                        | S3           |
| Figure S2. Oxidation kinetics of aniline by permanganate at pH 8.0.                                                                                        | S4           |
| Figure S3. The correlation of MnO <sub>2</sub> concentration with the increase in phenol oxidation rate at pH 4.5.                                         | S5           |
| Figure S4. Variation of the absorbance at 418 nm in the process of phenol oxidation by colloidal MnO <sub>2</sub> at pH 3.0.                               | S6           |
| Figure S5. Variation of the absorbance at 418 and 258 nm in the process of phenol oxidation by colloidal MnO <sub>2</sub> at pH 3.0 in the presence of PP. | S7           |
| Figure S6. Variation of the absorbance at 258 nm for the reduction of Mn(III)-PP by phenol at pH 3.0.                                                      | S8           |
| Figure S7. The correlation of Mn(III)-PP concentration with the increase in phenol oxidation rate at pH 3.0.                                               | S9           |
| Figure S8. Variation of the absorbance at 525, 418 and 258 nm in the process of phenol oxidation by permanganate at pH 3.0 in the presence of PP.          | S10          |
| Figure S9. The correlation of Mn(III)-PP concentration with the increase in phenol oxidation rate at pH 3.0.                                               | S11          |

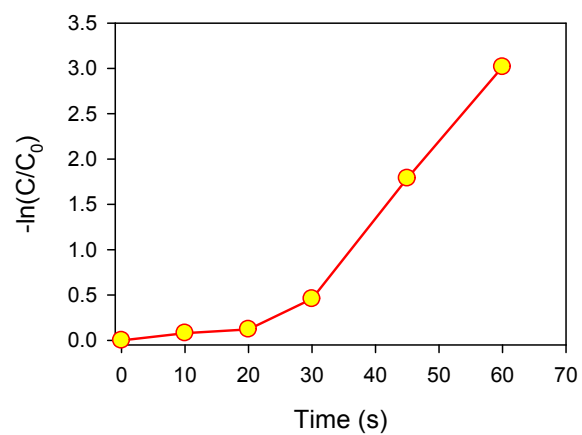

**Figure S1.** Oxidation kinetics of aniline by permanganate at pH 4.5. Experimental conditions:  $[\text{aniline}]_0 = 5.0 \mu\text{M}$ ,  $[\text{KMnO}_4]_0 = 50 \mu\text{M}$ .

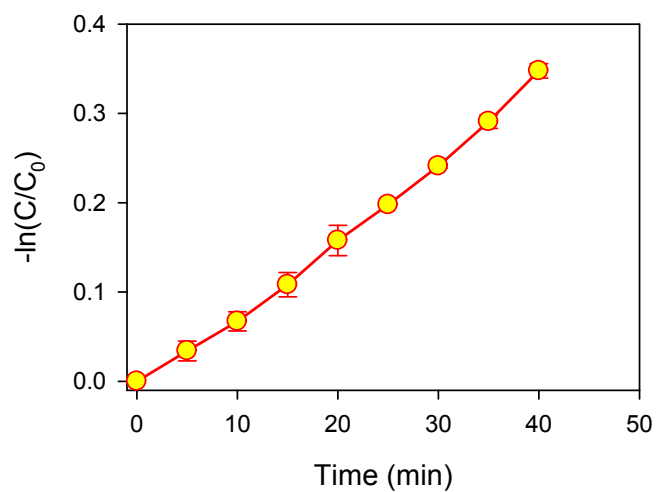

**Figure S2.** Oxidation kinetics of aniline by permanganate at pH 8.0. Experimental conditions:  $[\text{aniline}]_0 = 5.0 \mu\text{M}$ ,  $[\text{KMnO}_4]_0 = 50 \mu\text{M}$ .

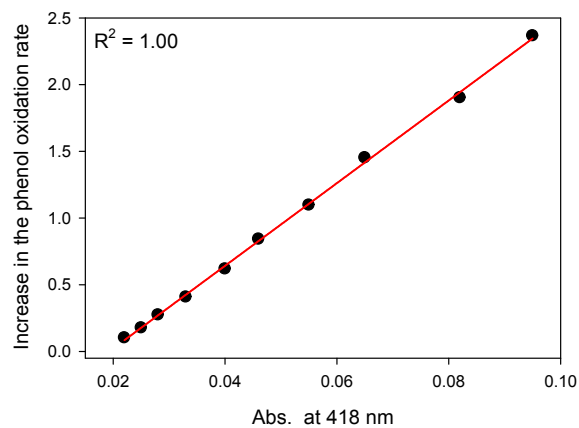

**Figure S3.** The correlation of  $\text{MnO}_2$  concentration (corresponding to the absorbance at 418 nm) with the increase in phenol oxidation rate at pH 4.5. The increase in the phenol oxidation rate was determined by subtracting the initial degradation rate of phenol by permanganate from the degradation rates at different time (Fig. 1). Experimental conditions:  $[\text{phenol}]_0 = 5.0 \mu\text{M}$ ,  $[\text{KMnO}_4]_0 = 50 \mu\text{M}$ .

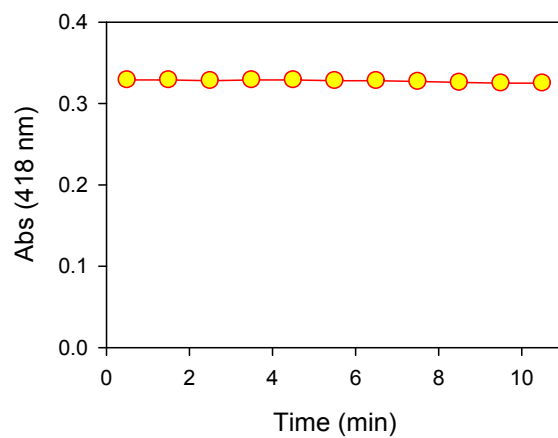

**Figure S4.** Variation of the absorbance at 418 nm in the process of phenol oxidation by colloidal  $\text{MnO}_2$  at pH 3.0. Experimental conditions:  $[\text{phenol}]_0 = 5.0 \mu\text{M}$ ,  $[\text{MnO}_2]_0 = 50 \mu\text{M}$ .

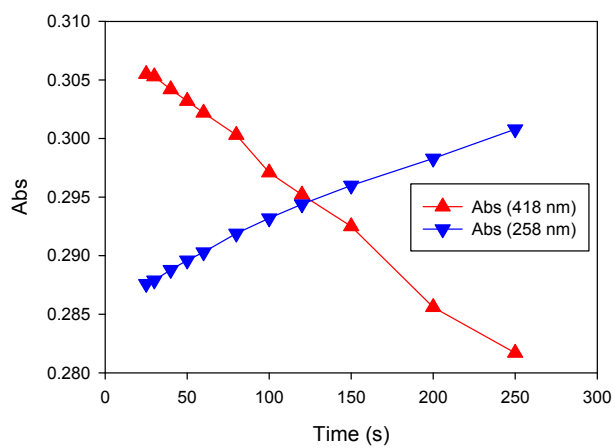

**Figure S5.** Variation of the absorbance at 418 and 258 nm in the process of phenol oxidation by colloidal  $\text{MnO}_2$  at pH 3.0 in the presence of PP. Experimental conditions:  $[\text{phenol}]_0 = 5.0 \mu\text{M}$ ,  $[\text{MnO}_2]_0 = 50 \mu\text{M}$ ,  $[\text{PP}] = 5 \text{ mM}$ .

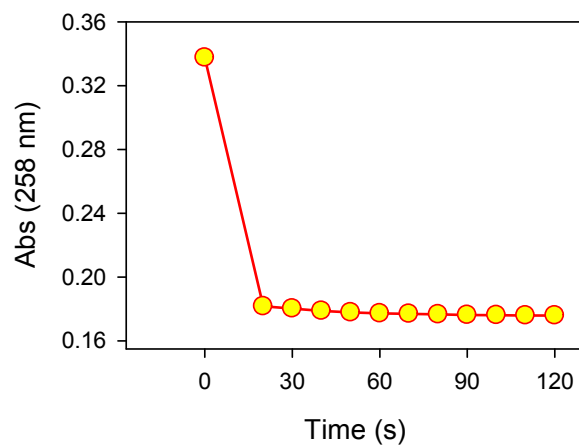

**Figure S6.** Variation of the absorbance at 258 nm for the reduction of Mn(III)-PP by phenol at pH 3.0. Experimental conditions:  $[\text{phenol}]_0 = 5.0 \mu\text{M}$ ,  $[\text{Mn(III)-PP}]_0 = 50 \mu\text{M}$ ,  $[\text{PP}]_0 = 5 \text{ mM}$ .



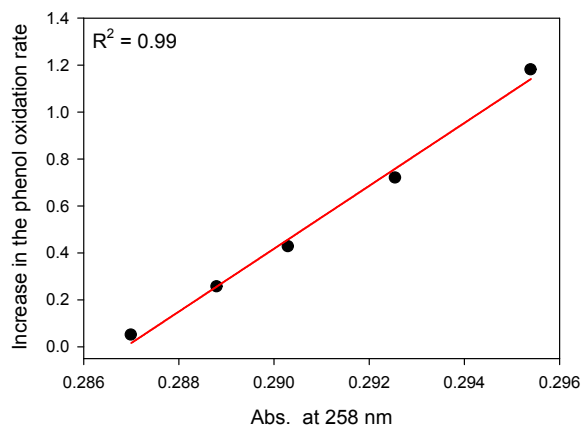

**Figure S7.** The correlation of Mn(III)-PP concentration (corresponding to the absorbance at 258 nm) with the increase in phenol oxidation rate by MnO<sub>2</sub> with time at pH 3.0. The increase in the phenol oxidation rate was obtained by subtracting the initial degradation rate of phenol by MnO<sub>2</sub> from the oxidation rates at different time (Fig. 6(A)). Experimental conditions: [phenol]<sub>0</sub> = 5.0 μM, [MnO<sub>2</sub>]<sub>0</sub> = 50 μM, [PP]<sub>0</sub> = 5.0 mM.

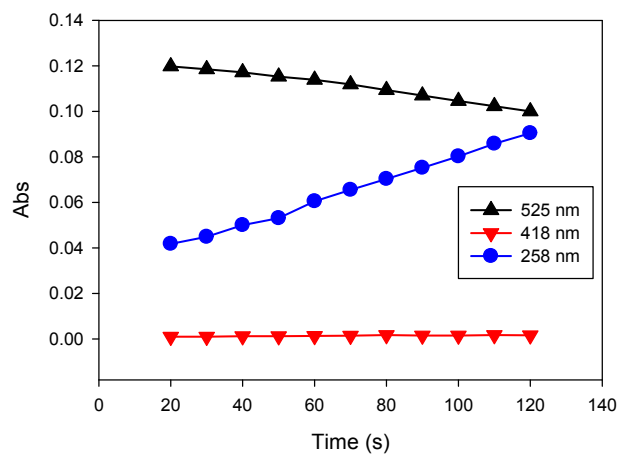

**Figure S8.** Variation of the absorbance at 525, 418 and 258 nm in the process of phenol oxidation by permanganate at pH 3.0 in the presence of PP. Experimental conditions:  $[\text{phenol}]_0 = 5.0 \mu\text{M}$ ,  $[\text{KMnO}_4]_0 = 50 \mu\text{M}$ ,  $[\text{PP}] = 5 \text{ mM}$ .

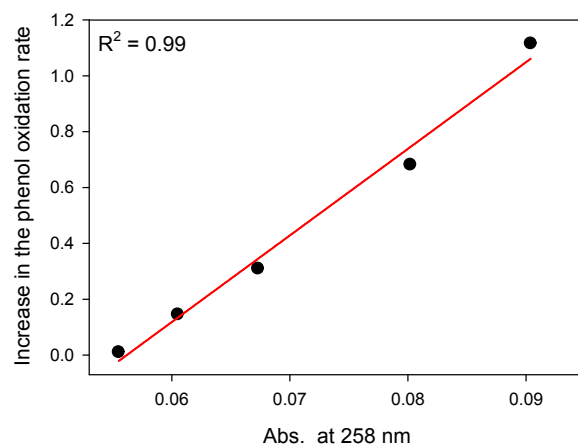

**Figure S9.** The correlation of Mn(III)-PP concentration (corresponding to the absorbance at 258 nm) with the increase in phenol oxidation rate by  $\text{KMnO}_4$  with time at pH 3.0. The increase in the phenol oxidation rate was obtained by subtracting the initial degradation rate of phenol by permanganate from the oxidation rates of phenol at different time (Fig. 8(A)). Experimental conditions:  $[\text{phenol}]_0 = 5.0 \mu\text{M}$ ,  $[\text{KMnO}_4]_0 = 50 \mu\text{M}$ ,  $[\text{PP}]_0 = 5.0 \text{ mM}$ .
